# Supplementary material
Source: PubMed Central journal article supplement (PMC6752281)

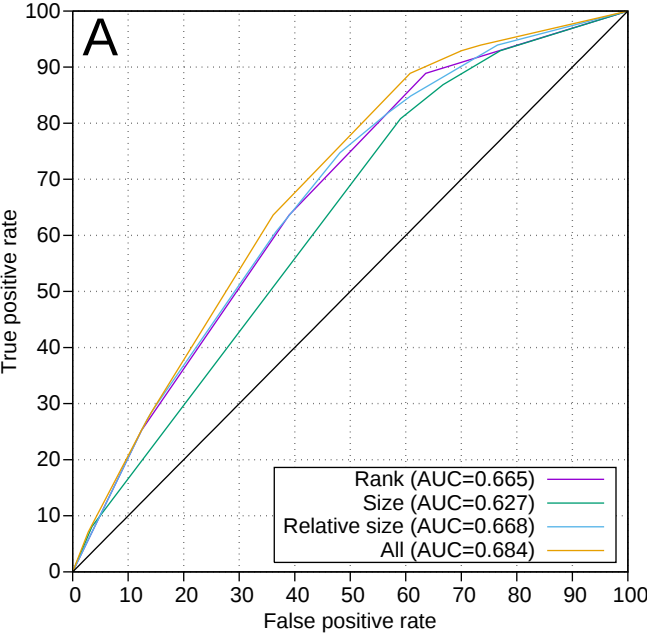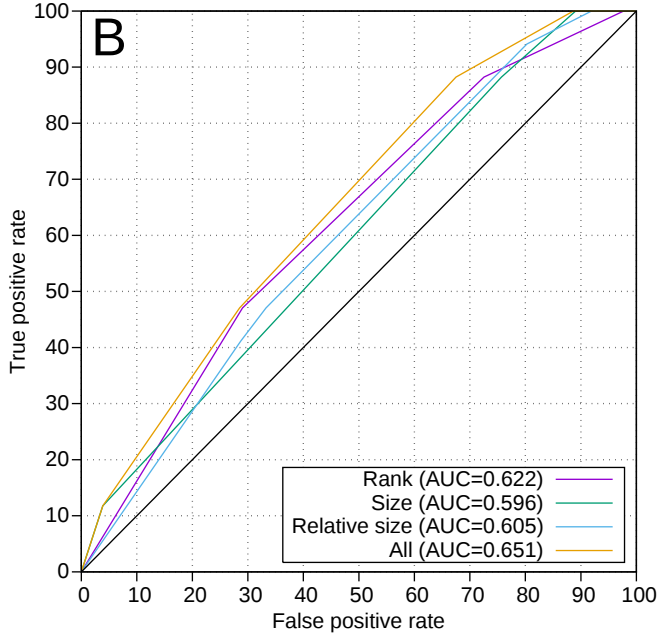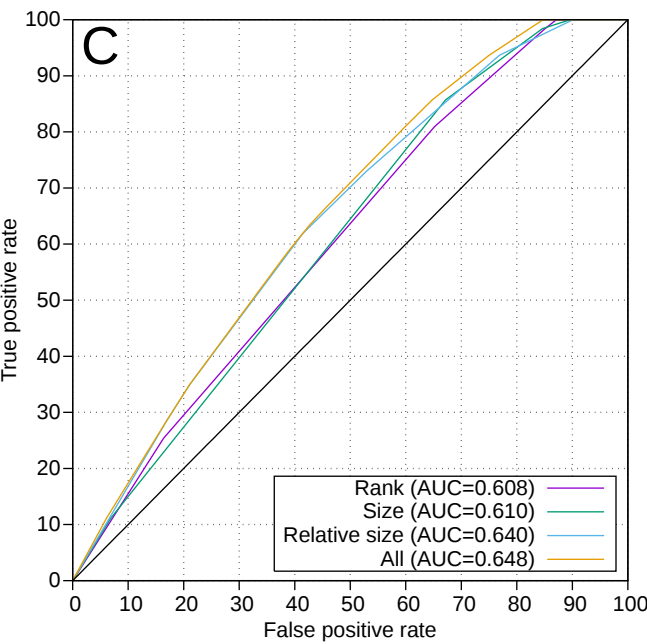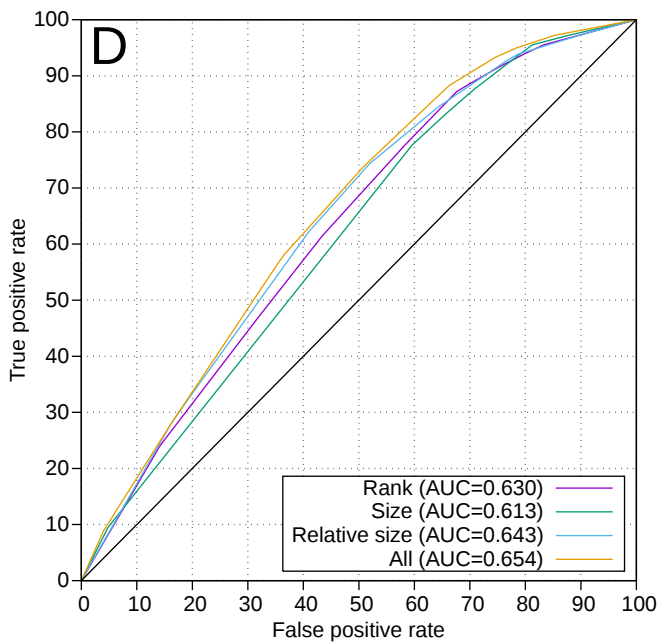

Supplement: 41436_2018_281_MOESM1_ESM.pdf [file 41436_2018_281_MOESM1_ESM.pdf]
