# Supplementary material
Source: PubMed Central journal article supplement (PMC6752281)

Pathogenic homozygous variants (dark gray bar)  
Bases in homozygous regions (white bar)

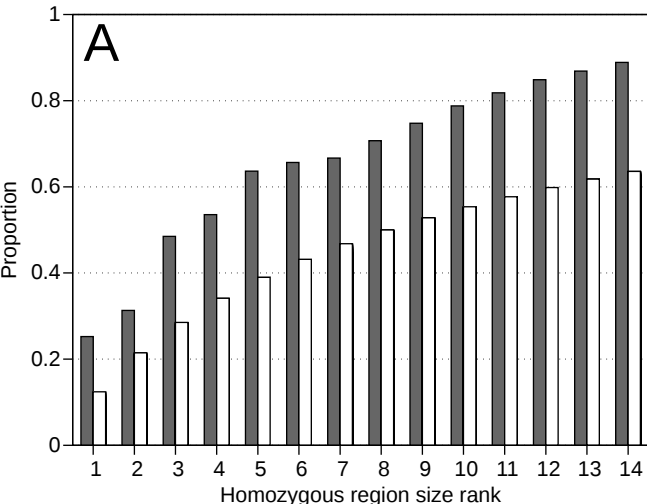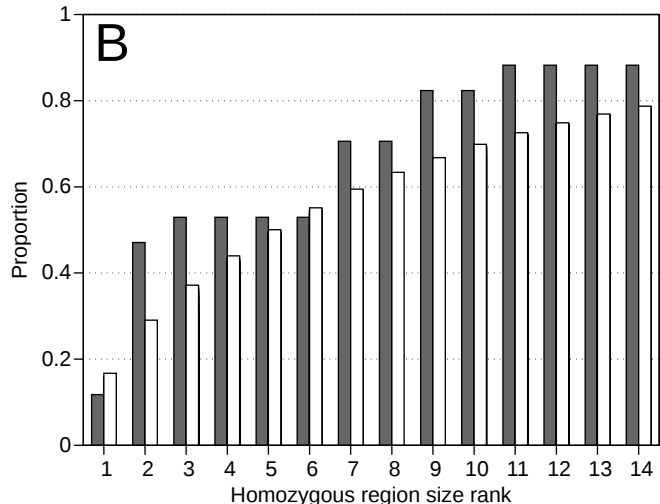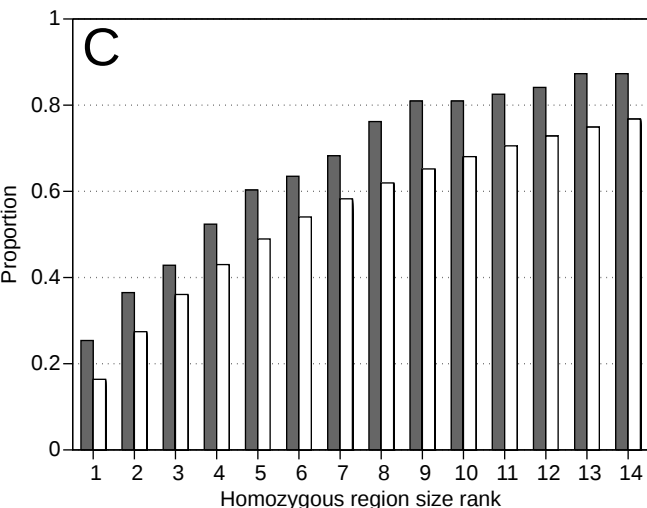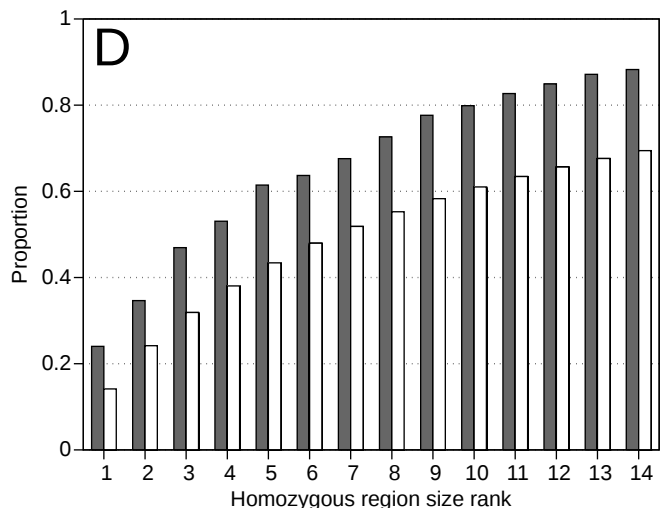

Supplement: 41436_2018_281_MOESM2_ESM.pdf [file 41436_2018_281_MOESM2_ESM.pdf]
